# Supplementary material for: UV and X-ray dual-induced photochromism in a benzophenone-based metal–organic framework for inkless erasable printing
Source: Royal Society of Chemistry journal article supplement (doi:10.1039/d3ce00398a), 2023-01-01
Supplement: d3ce00398a1.pdf [file d3ce00398a1.pdf]

## Supporting Information

### **UV and X-ray dual-induced photochromism in a benzophenone-based metal-organic framework for inkless erasable printing**

Le-Tian Zhang,<sup>a</sup> Zi-Xuan Fu,<sup>b</sup> Jia-Cheng Yin,<sup>b</sup> Ming Liu,<sup>b</sup> Yin-Qiang Zhang,<sup>a</sup> Lan Lan,<sup>b</sup> Na Li,<sup>a\*</sup> and Xian-He Bu<sup>a,b</sup>

<sup>a</sup>College of Chemistry, State Key Laboratory of Elemento-Organic Chemistry, Nankai University, Tianjin 300071, P. R. China.

<sup>b</sup>School of Materials Science and Engineering, Nankai University, Tianjin 300350, P. R. China

E-mail: [lina@nankai.edu.cn](mailto:lina@nankai.edu.cn)

**Table S1.** Crystallographic data and structure refinement for **1** before and after UV irradiation.

| Compound                                                                                 | <b>1</b>                                                          | <b>1-after</b>                                                    |
|------------------------------------------------------------------------------------------|-------------------------------------------------------------------|-------------------------------------------------------------------|
| Chemical formula                                                                         | Zn <sub>4</sub> C <sub>37</sub> H <sub>19</sub> O <sub>21</sub> N | Zn <sub>4</sub> C <sub>37</sub> H <sub>19</sub> O <sub>21</sub> N |
| Formula weight                                                                           | 1075.01                                                           | 1075.01                                                           |
| Temperature/(K)                                                                          | 293(2)                                                            | 293(2)                                                            |
| Wavelength/(Å)                                                                           | 1.54184                                                           | 1.54184                                                           |
| Crystal system                                                                           | Triclinic                                                         | Triclinic                                                         |
| Space group                                                                              | <i>P</i> 1                                                        | <i>P</i> 1                                                        |
| <i>a</i> /(Å)                                                                            | 9.8670(5)                                                         | 9.8663(3)                                                         |
| <i>b</i> /(Å)                                                                            | 12.0062(7)                                                        | 11.9838(6)                                                        |
| <i>c</i> /(Å)                                                                            | 13.1276(6)                                                        | 13.1236(5)                                                        |
| <i>α</i> /(°)                                                                            | 115.459(5)                                                        | 115.559(4)                                                        |
| <i>β</i> /(°)                                                                            | 93.033(4)                                                         | 93.042(3)                                                         |
| <i>γ</i> /(°)                                                                            | 91.808(4)                                                         | 91.661(3)                                                         |
| Volume/(Å <sup>3</sup> )                                                                 | 1399.63(14)                                                       | 1395.54(11)                                                       |
| <i>Z</i>                                                                                 | 1                                                                 | 1                                                                 |
| <i>D</i> <sub>c</sub> /(g cm <sup>-3</sup> )                                             | 1.275                                                             | 1.279                                                             |
| Absorption coefficient                                                                   | 2.505                                                             | 2.512                                                             |
| <i>F</i> (000)                                                                           | 536                                                               | 536                                                               |
| Reflections collected                                                                    | 28574                                                             | 29070                                                             |
| Index ranges                                                                             | -12 ≤ <i>h</i> ≤ 12<br>-15 ≤ <i>k</i> ≤ 15<br>-16 ≤ <i>l</i> ≤ 16 | -12 ≤ <i>h</i> ≤ 12<br>-15 ≤ <i>k</i> ≤ 15<br>-16 ≤ <i>l</i> ≤ 16 |
| Data/Restraints/parameters                                                               | 10641/21/571                                                      | 10652/22/571                                                      |
| GOF on <i>F</i> <sup>2</sup>                                                             | 1.063                                                             | 1.039                                                             |
| <sup>a</sup> <i>R</i> <sub>1</sub> / <i>wR</i> <sub>2</sub> [ <i>I</i> > 2σ( <i>I</i> )] | 0.0378/0.1062                                                     | 0.0323/0.0934                                                     |
| <sup>a</sup> <i>R</i> <sub>1</sub> / <i>wR</i> <sub>2</sub> [(all data)]                 | 0.0398/0.1086                                                     | 0.0346/0.0970                                                     |
| Largest diff. peak/hole / e Å <sup>-3</sup>                                              | 2.67/-1.02                                                        | 2.8/-0.8                                                          |
| Flack parameter                                                                          | 0.36(3)                                                           | 0.39(2)                                                           |

$$^a R_1 = \frac{\sum ||F_o| - |F_c||}{\sum |F_o|}; wR_2 = \left\{ \frac{\sum [w(F_o^2 - F_c^2)^2]}{\sum w (F_o^2)^2} \right\}^{1/2}$$

**Table S2.** Selected bond lengths for **1**.

| Bond lengths (Å)          |          |                          |          |
|---------------------------|----------|--------------------------|----------|
| O(1) <sup>10</sup> -Zn(1) | 1.963(4) | O(11)-Zn(3) <sup>5</sup> | 1.975(3) |
| O(2) <sup>13</sup> -Zn(4) | 2.052(4) | O(11)-Zn(4) <sup>6</sup> | 2.131(3) |
| O(3) <sup>7</sup> -Zn(2)  | 1.972(4) | O(12)-Zn(2)              | 1.984(4) |
| O(4) <sup>14</sup> -Zn(4) | 2.138(4) | O(14)-Zn(3) <sup>7</sup> | 2.003(4) |
| O(7)-Zn(3)                | 1.890(4) | O(15)-Zn(1) <sup>8</sup> | 1.981(4) |
| O(9)-Zn(2)                | 1.966(4) | O(17)-Zn(4)              | 2.014(3) |
| O(10)-Zn(1)               | 1.882(4) | O(19)-Zn(4) <sup>9</sup> | 2.262(4) |
| O(10)-Zn(2)               | 1.944(4) | O(20)-Zn(3)              | 1.978(4) |
| O(11)-Zn(1)               | 1.963(3) | O(21)-Zn(4)              | 2.076(4) |

**Table S3.** Selected bond angles for **1**.

| Bond angles (°)                               |            |                                                |            |
|-----------------------------------------------|------------|------------------------------------------------|------------|
| O(1) <sup>10</sup> -Zn(1)-O(15) <sup>11</sup> | 101.26(18) | O(2) <sup>13</sup> -Zn(4)-O(19) <sup>16</sup>  | 87.28(16)  |
| O(10)-Zn(1)-O(1) <sup>10</sup>                | 112.6(2)   | O(2) <sup>13</sup> -Zn(4)-O(21)                | 84.57(17)  |
| O(10)-Zn(1)-O(11)                             | 117.17(17) | O(4) <sup>14</sup> -Zn(4)-O(19) <sup>16</sup>  | 172.02(15) |
| O(10)-Zn(1)-O(15) <sup>11</sup>               | 102.68(18) | O(11) <sup>15</sup> -Zn(4)-O(4) <sup>14</sup>  | 87.70(14)  |
| O(11)-Zn(1)-O(1) <sup>10</sup>                | 115.08(16) | O(11) <sup>15</sup> -Zn(4)-O(19) <sup>16</sup> | 85.46(14)  |
| O(11)-Zn(1)-O(15) <sup>11</sup>               | 105.53(15) | O(17)-Zn(4)-O(2) <sup>13</sup>                 | 172.40(16) |
| O(3) <sup>7</sup> -Zn(2)-O(12)                | 101.87(19) | O(17)-Zn(4)-O(4) <sup>14</sup>                 | 95.97(15)  |
| O(9)-Zn(2)-O(3) <sup>7</sup>                  | 105.25(17) | O(17)-Zn(4)-O(11) <sup>15</sup>                | 91.11(14)  |
| O(9)-Zn(2)-O(12)                              | 111.20(19) | O(17)-Zn(4)-O(19) <sup>16</sup>                | 88.28(16)  |
| O(10)-Zn(2)-O(3) <sup>7</sup>                 | 113.3(2)   | O(17)-Zn(4)-O(21)                              | 89.23(17)  |
| O(10)-Zn(2)-O(9)                              | 103.28(19) | O(21)-Zn(4)-O(4) <sup>14</sup>                 | 97.21(19)  |
| O(10)-Zn(2)-O(12)                             | 121.1(2)   | O(21)-Zn(4)-O(11) <sup>15</sup>                | 175.01(19) |
| O(7)-Zn(3)-O(11) <sup>12</sup>                | 129.62(18) | O(21)-Zn(4)-O(19) <sup>16</sup>                | 89.58(19)  |
| O(7)-Zn(3)-O(14) <sup>3</sup>                 | 110.37(18) | O(5)-C(9)-C(4)                                 | 120.7(4)   |
| O(7)-Zn(3)-O(20)                              | 107.70(19) | O(5)-C(9)-C(10)                                | 120.4(5)   |
| O(11) <sup>12</sup> -Zn(3)-O(14) <sup>3</sup> | 103.74(15) | O(16)-C(26)-C(24)                              | 120.7(5)   |
| O(11) <sup>12</sup> -Zn(3)-O(20)              | 99.17(16)  | O(16)-C(26)-C(27)                              | 120.8(5)   |
| O(20)-Zn(3)-O(14) <sup>3</sup>                | 102.98(17) | O(2) <sup>13</sup> -Zn(4)-O(11) <sup>15</sup>  | 94.68(14)  |
| O(2) <sup>13</sup> -Zn(4)-O(4) <sup>14</sup>  | 89.19(16)  |                                                |            |

Symmetry transformations used to generate equivalent atoms: <sup>1</sup> 1+X,+Y,-1+Z; <sup>2</sup> 2+X,1+Y,+Z; <sup>3</sup> +X,+Y,-1+Z; <sup>4</sup> 1+X,1+Y,+Z; <sup>5</sup> +X,1+Y,1+Z; <sup>6</sup> 1+X,1+Y,1+Z; <sup>7</sup> +X,+Y,1+Z; <sup>8</sup> +X,-1+Y,+Z; <sup>9</sup> 1+X,+Y,+Z; <sup>10</sup> -1+X,+Y, 1+Z; <sup>11</sup> +X,1+Y,+Z; <sup>12</sup> +X,-1+Y,-1+Z; <sup>13</sup> -2+X,-1+Y,+Z; <sup>14</sup> -1+X,-1+Y,+Z; <sup>15</sup> -1+X,-1+Y,-1+Z; <sup>16</sup> -1+X,+Y,+Z.

**Table S4.** Selected bond lengths for **1** after UV irradiation.

| Bond lengths (Å)         |          |                          |          |
|--------------------------|----------|--------------------------|----------|
| O(2)-Zn(3) <sup>1</sup>  | 1.963(3) | O(11)-Zn(2)              | 1.902(4) |
| O(3)-Zn(1)               | 1.894(4) | O(11)-Zn(3)              | 1.949(4) |
| O(6)-Zn(4) <sup>2</sup>  | 2.141(4) | O(12)-Zn(3)              | 1.975(4) |
| O(7)-Zn(3) <sup>3</sup>  | 1.969(3) | O(14)-Zn(1) <sup>6</sup> | 2.002(3) |
| O(8)-Zn(4) <sup>4</sup>  | 2.051(3) | O(15)-Zn(2) <sup>7</sup> | 1.993(3) |
| O(9)-Zn(2)               | 1.967(3) | O(17)-Zn(4) <sup>6</sup> | 2.267(4) |
| O(10)-Zn(1) <sup>5</sup> | 1.975(3) | O(18)-Zn(1) <sup>8</sup> | 1.983(3) |
| O(10)-Zn(2)              | 1.956(3) | O(20)-Zn(4)              | 2.015(3) |
| O(10)-Zn(4) <sup>4</sup> | 2.132(3) | O(21)-Zn(4)              | 2.077(4) |

**Table S5.** Selected bond angles for **1** after UV irradiation.

| Bond angles (°)                              |            |                                               |            |
|----------------------------------------------|------------|-----------------------------------------------|------------|
| O(3)-Zn(1)-O(10) <sup>9</sup>                | 129.77(17) | O(8) <sup>12</sup> -Zn(4)-O(10) <sup>12</sup> | 94.22(13)  |
| O(3)-Zn(1)-O(14) <sup>3</sup>                | 110.14(16) | O(8) <sup>12</sup> -Zn(4)-O(17) <sup>3</sup>  | 87.41(15)  |
| O(3)-Zn(1)-O(18) <sup>1</sup>                | 107.91(17) | O(8) <sup>12</sup> -Zn(4)-O(21)               | 85.02(16)  |
| O(10) <sup>9</sup> -Zn(1)-O(14) <sup>3</sup> | 103.52(14) | O(10) <sup>12</sup> -Zn(4)-O(6) <sup>11</sup> | 87.34(13)  |
| O(10) <sup>9</sup> -Zn(1)-O(18) <sup>1</sup> | 99.11(14)  | O(10) <sup>12</sup> -Zn(4)-O(17) <sup>3</sup> | 85.64(13)  |
| O(18) <sup>1</sup> -Zn(1)-O(14) <sup>3</sup> | 103.21(15) | O(20)-Zn(4)-O(6) <sup>11</sup>                | 96.45(14)  |
| O(9)-Zn(2)-O(15) <sup>10</sup>               | 101.20(16) | O(20)-Zn(4)-O(8) <sup>12</sup>                | 172.38(15) |
| O(10)-Zn(2)-O(9)                             | 115.37(15) | O(20)-Zn(4)-O(10) <sup>12</sup>               | 91.36(13)  |
| O(10)-Zn(2)-O(15) <sup>10</sup>              | 105.84(14) | O(20)-Zn(4)-O(17) <sup>3</sup>                | 87.85(14)  |
| O(11)-Zn(2)-O(9)                             | 112.24(19) | O(20)-Zn(4)-O(21)                             | 88.95(15)  |
| O(11)-Zn(2)-O(10)                            | 117.41(16) | O(21)-Zn(4)-O(6) <sup>11</sup>                | 97.80(17)  |
| O(11)-Zn(2)-O(15)                            | 102.12(16) | O(21)-Zn(4)-O(10) <sup>12</sup>               | 174.78(17) |
| O(2) <sup>8</sup> -Zn(3)-O(7) <sup>6</sup>   | 104.99(16) | O(21)-Zn(4)-O(17) <sup>3</sup>                | 89.17(17)  |
| O(2) <sup>8</sup> -Zn(3)-O(12)               | 111.26(17) | O(5)-C(9)-C(7)                                | 120.5(4)   |
| O(7) <sup>6</sup> -Zn(3)-O(12)               | 101.76(17) | O(5)-C(9)-C(10)                               | 120.2(4)   |
| O(11)-Zn(3)-O(2) <sup>8</sup>                | 102.33(17) | O(16)-C(26)-C(24)                             | 120.7(4)   |
| O(11)-Zn(3)-O(7) <sup>6</sup>                | 114.22(18) | O(16)-C(26)-C(27)                             | 121.1(4)   |
| O(11)-Zn(3)-O(12)                            | 121.44(19) | O(8) <sup>12</sup> -Zn(4)-O(6) <sup>11</sup>  | 89.00(15)  |
| O(6) <sup>11</sup> -Zn(4)-O(17) <sup>3</sup> | 171.85(14) |                                               |            |

Symmetry transformations used to generate equivalent atoms: <sup>1</sup> -1+X,+Y,1+Z; <sup>2</sup> +X,1+Y,1+Z; <sup>3</sup> -1+X,+Y,+Z; <sup>4</sup> 1+X,1+Y,1+Z; <sup>5</sup> 1+X,1+Y,+Z; <sup>6</sup> 1+X,+Y,+Z; <sup>7</sup> +X,-1+Y,+Z; <sup>8</sup> 1+X,+Y,-1+Z; <sup>9</sup> -1+X,-1+Y,+Z; <sup>10</sup> +X,1+Y,+Z; <sup>11</sup> +X,-1+Y,-1+Z; <sup>12</sup> -1+X,-1+Y,-1+Z.

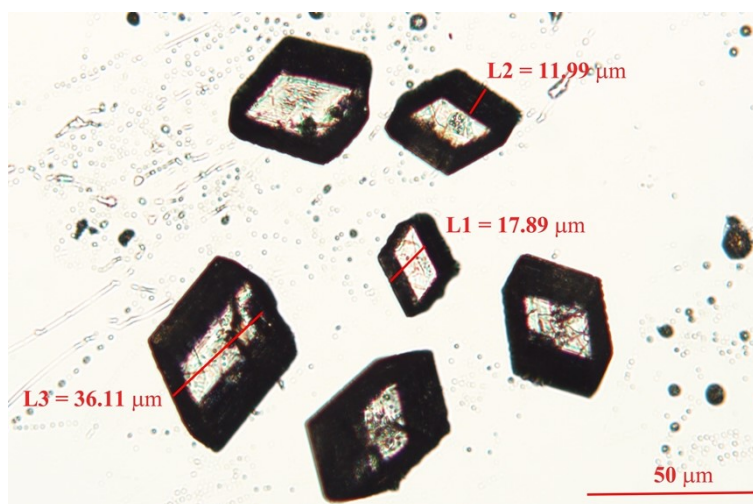

**Figure S1.** Optical image of as-synthesized **1** single crystals.

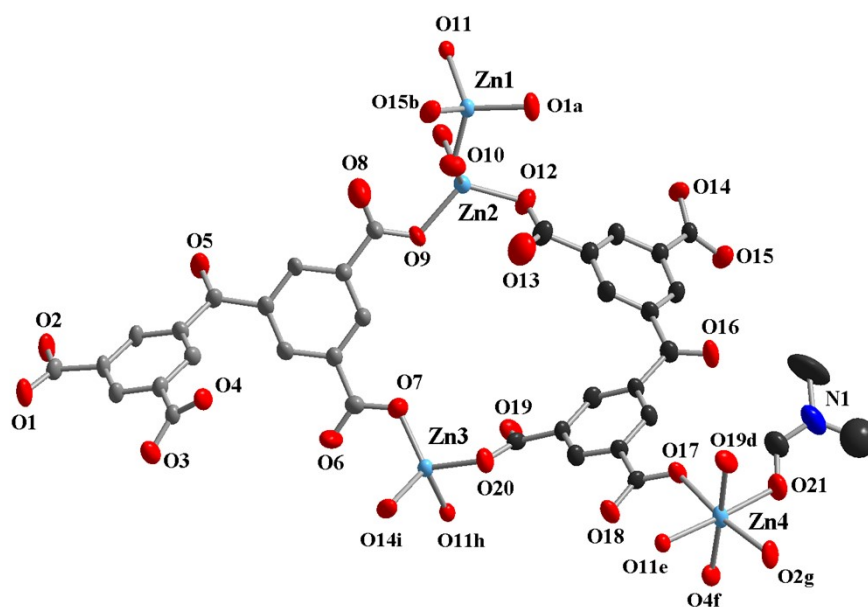

**Figure S2.** The coordination environments of  $\text{Zn}^{2+}$  cations and  $\text{cdip}^{4-}$  ligands in **1**. H atoms are omitted for clarity (similarly hereafter). Colour code: Zn in cyan, O in red, N in blue, and C in grey and black.

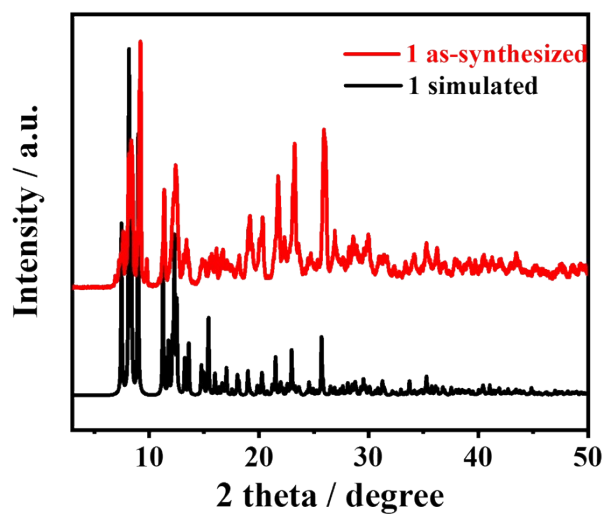

**Figure S3.** The PXRD patterns for the as-synthesized **1**, compared with the simulated pattern of **1**.

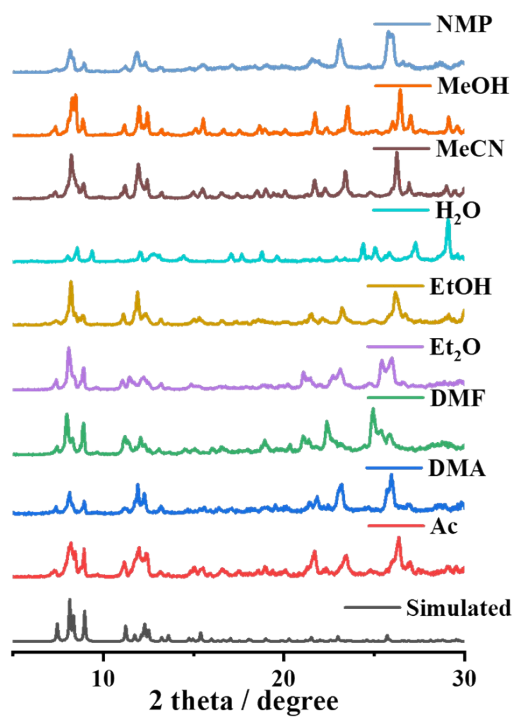

**Figure S4.** The PXRD patterns of **1** soaked in different solvents for 72 h.

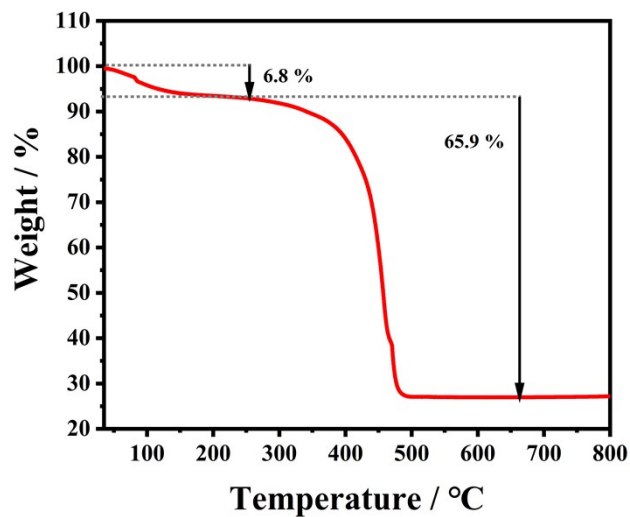

**Figure S5.** Thermogravimetric analysis (TGA) curve of activated **1**.

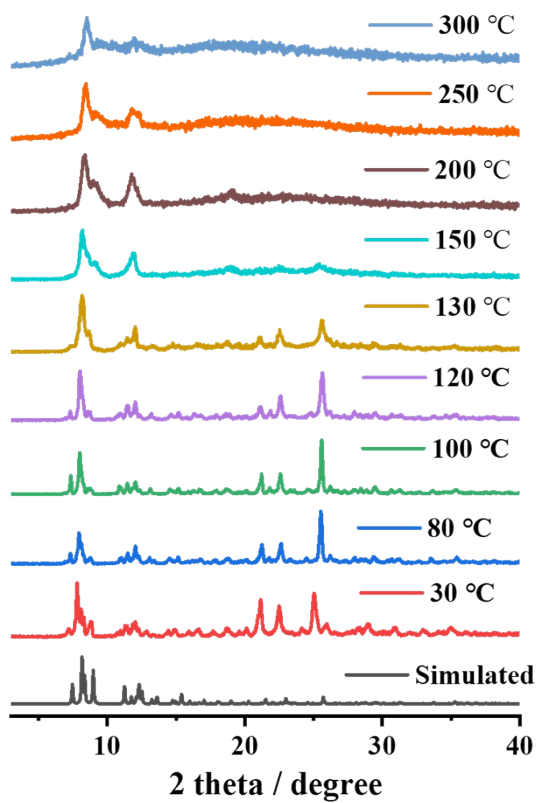

**Figure S6.** Variable temperature PXRD patterns of **1**.

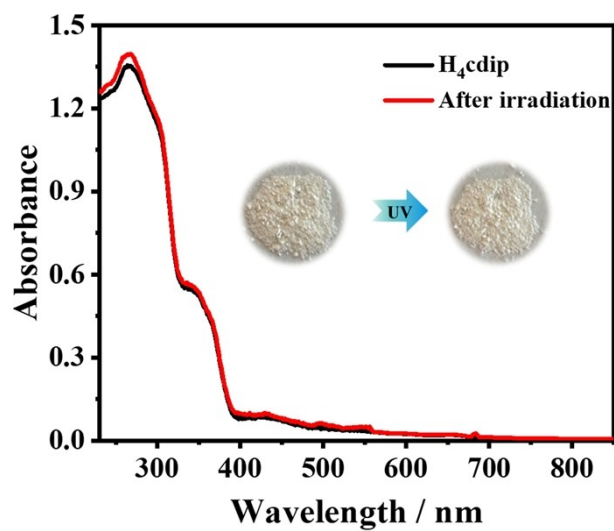

**Figure S7.** UV-vis absorption spectra of H<sub>4</sub>cdip before and after UV irradiation.

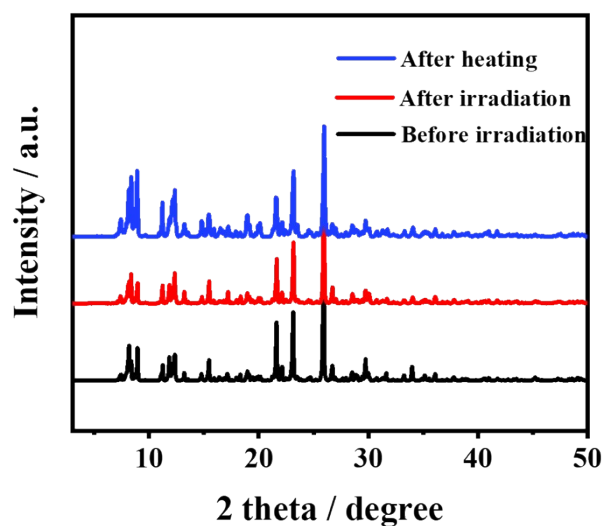

**Figure S8.** The PXRD patterns of **1** before and after UV irradiation and after heating at 100 °C.



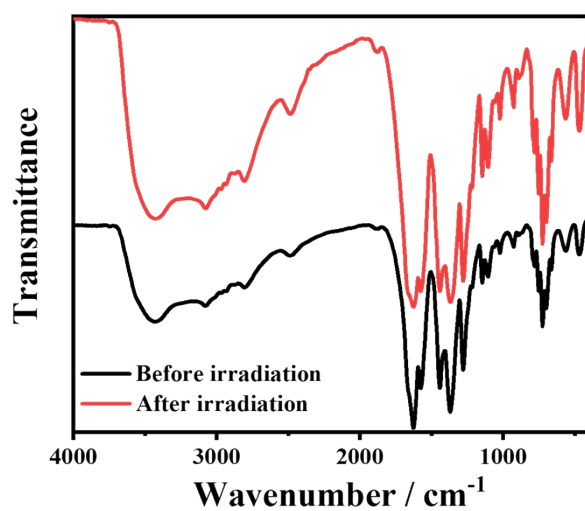

**Figure S9.** The FT-IR patterns of **1** before and after UV irradiation.

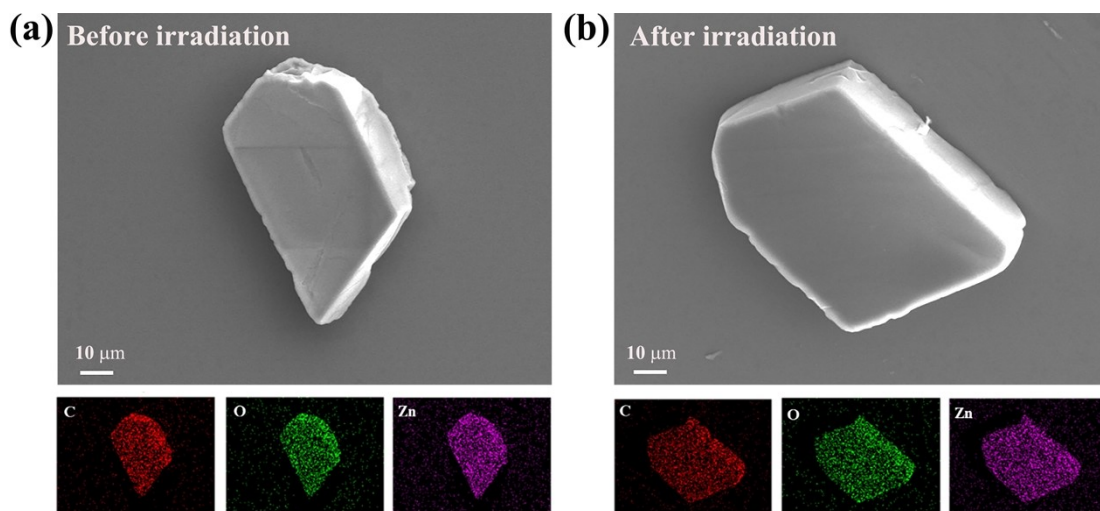

**Figure S10.** SEM images of **1** before and after UV irradiation.

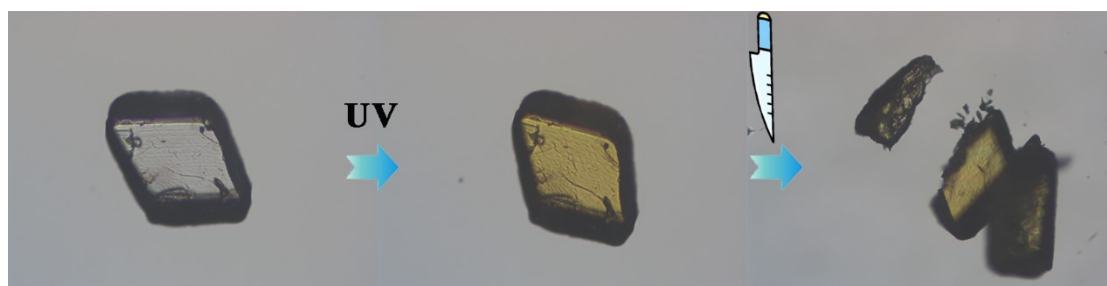

**Figure S11.** Interior and exterior color transition of the single crystal of **1** under UV irradiation.

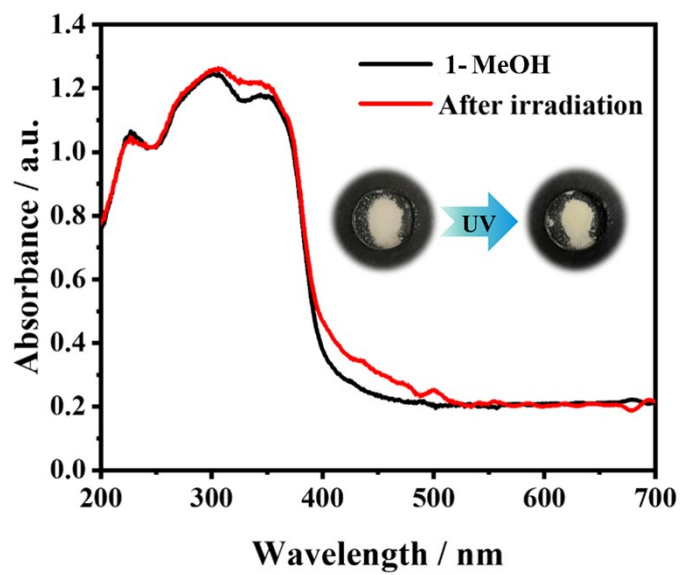

**Figure S12.** UV-vis absorption spectra of 1-MeOH before and after UV irradiation for 20 min.

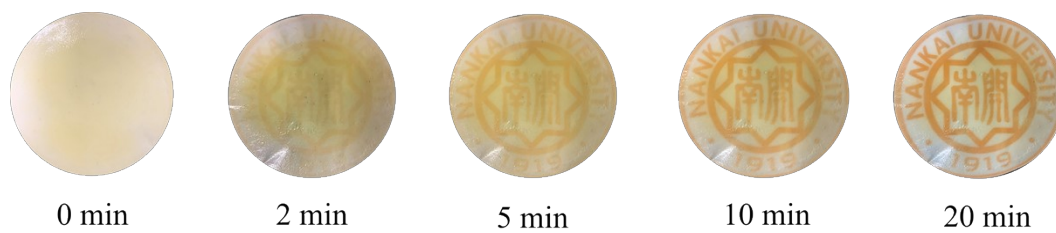

**Figure S13.** The printing effect of prepared printing paper at different irradiation time.
